# Supplementary material for: Reproductive biology of little tunny Euthynnus alletteratus (Rafinesque, 1810) in the southwest Gulf of Mexico
Source: PeerJ. 2019 Apr 2;7:e6558. doi: 10.7717/peerj.6558 (PMC6450369; doi:10.7717/peerj.6558)
Supplement: Supplemental Information 1 — Database of the corporal indexes, temperature and histologic components of E. alletteratus using in this study. [file peerj-07-6558-s001.xlsx]

## Sheet: Glossary
RG	RIPE GAMETES
UG	UNRIPE GAMETES
FS	FREE SPACE INSIDE THE GONAD
VCT	CONNECTIVE TISSUE
IG	GODASOMATIC INDEX
IH	HEPATOSOMATIC INDEX
IN	NUTRITIONAL INDEX (Ke)
LF	FORK LENGTH
LFC	CURVED FORK LENGTH
K	CONDITION FACTOR
Ke (IN)	CONDITION FACTOR WITHOUT VISCERA

## Sheet: histologic components and IG
	%RG	%UG	%FS	%VCT	IG MALE
DECEMBER	0	0	0	100	0.0473878
JANUARY	0.15873	6.66667	0.47619	92.6984	0.192469		DATE	IG Females	SEx IG Females	IG Males	SEx IG Males
FEBRUARY					0.279361		December	0.268103	0.0411231	0.0473878	0.0138547
MARCH	21.2925	26.3946	3.40136	48.9116	0.998065		January	0.591517	0.0427846	0.192469	0.0539148
APRIL	54.8571	27	4.66667	13.4762	2.60088		February	0.554384	0.0310993	0.279361	0.152466
MAY	65.9524	28.6508	1.19048	4.20635	1.71409		March	1.19796	0.131644	0.998065	0.183617
JUNE					1.22573		April	2.8303	0.193389	2.60088	0.159421
JULY	35.8095	61.619	0.952381	1.61905	3.68525		May	1.842	0.295179	1.71409	0.280627
AUGUST							June	0.826932	0.368993	1.22573	0.0791234
SEPTEMBER	33.3333	13.8095	0.952381	51.9048	1.23022		July	4.18821	0.315798	3.68525	0.407711
OCTOBER	3.88889	10.0794	1.03175	85	0.306303		August
NOVEMBER	0.680272	6.73469	0	92.585	0.12096		September	1.815	0.245493	1.23022	0.0946856
*MALES							October	0.343385	0.0244345	0.306303	0.179933
							November	0.341429	0.0504356	0.12096	0.032244
	%RG	%UG	%FS	%VCT	IG FEMALES
DECEMBER	13.6508	32.2857	38.3492	15.7143	0.268103
JANUARY	14.5238	27.381	46.7143	11.381	0.591517
FEBRUARY					0.554384
MARCH	39.3506	23.8961	30.3896	6.36364	1.19796
APRIL	43.3929	20	28.1548	8.45238	2.8303
MAY	77.8571	7.85714	10.9524	3.33333	1.842
JUNE	65.9259	4.49735	27.4603	2.1164	0.826932
JULY	95.381	0.428571	4.19048	0	4.18821
AUGUST
SEPTEMBER	56.3946	9.11565	31.2245	3.26531	1.815
OCTOBER	9.90476	27.1429	35.5238	27.4286	0.343385
NOVEMBER	6.50137	29.3498	38.775	25.3738	0.341429
*FEMALES

## Sheet: PIVOT TABLE TEMPERATURE
	Datos
MONTH	Promedio - TEMPERATURE	DevNorm - TEMPERATURE
ABRIL	25.54	#VALUE!
APRIL	25.2705	0.956715
AUGUST	28.6407	0.426071
DECEMBER	24.0267	0.464715
FEBRUARY	22.5943	0.620794
JANUARY	22.249	1.82142
JULY	28.3807	0.602303
JUNE	27.361	0.3797
MARCH	23.528	1.03306
MAY	26.521	0.468747
NOVEMBER	25.8607	0.577526
OCTOBER	27.625	0.427102
SEPTEMBER	29.0237	0.500122
Total Resultado	25.9309	2.40275

## Sheet: TEMPERATURE
MONTH	YEAR	TEMPERATURE		MONTH	TEMPERATURE	std dev. Temp
DECEMBER	2009	24.267		JANUARY	22.249	1.82142
JANUARY	2010	20.176		FEBRUARY	22.5943	0.620794
FEBRUARY	2010	21.909		MARCH	23.528	1.03306
MARCH	2010	22.523		APRIL	25.3603	0.694163
APRIL	2010	24.594		MAY	26.521	0.468747
MAY	2010	26.219		JUNE	27.361	0.3797
JUNE	2010	26.925		JULY	28.3807	0.602303
JULY	2010	28.564		AUGUST	28.6407	0.426071
AUGUST	2010	28.176		SEPTEMBER	29.0237	0.500122
SEPTEMBER	2010	28.577		OCTOBER	27.625	0.427102
OCTOBER	2010	27.141		NOVEMBER	25.8607	0.577526
NOVEMBER	2010	25.28		DECEMBER	24.0267	0.464715
DECEMBER	2010	23.491
JANUARY	2011	22.978
FEBRUARY	2011	22.755
MARCH	2011	23.474
ABRIL	2011	25.54
MAY	2011	26.283
JUNE	2011	27.539
JULY	2011	27.708
AUGUST	2011	28.733
SEPTEMBER	2011	28.93
OCTOBER	2011	27.785
NOVEMBER	2011	25.867
DECEMBER	2011	24.322
JANUARY	2012	23.593
FEBRUARY	2012	23.119
MARCH	2012	24.587
APRIL	2012	25.947
MAY	2012	27.061
JUNE	2012	27.619
JULY	2012	28.87
AUGUST	2012	29.013
SEPTEMBER	2012	29.564
OCTOBER	2012	27.949
NOVEMBER	2012	26.435

## Sheet: RIPE GAMETES VARIATION
	%RG MALES	SEx %RG	%RG FEMALES	SEx %RG	TEMPERATURE	Stan. Dev. temp
DECEMBER			13.6508	1.14556	24.0267	0.464715
JANUARY	0.15873	0.15873	14.5238	0.707196	22.249	1.82142
FEBRUARY					22.5943	0.620794
MARCH	21.2925	11.428	39.3506	7.5855	23.528	1.03306
APRIL	54.8571	9.19096	43.3929	6.86267	25.3603	0.694163
MAY	65.9524	9.09906	77.8571	4.7551	26.521	0.468747
JUNE			65.9259	5.41611	27.361	0.3797
JULY	35.8095	16.5269	95.381	1.28767	28.3807	0.602303
AUGUST					28.6407	0.426071
SEPTEMBER	33.3333	33.3333	56.3946	9.14015	29.0237	0.500122
OCTOBER	3.88889	2.80486	9.90476	1.33711	27.625	0.427102
NOVEMBER	0.680272	0.680272	6.50137	0.672434	25.8607	0.577526

## Sheet: HISTOLOGIC COMPONENTS AND SE MALES
	%RG	SEx %RG	COUNT %RG	STAND. DEV. %RG	%UG	SEx %UG	COUNT %UG	STAND. DEV. %UG	%FS	SEx %FS	COUNT %FS	STAND. DEV %FS	%VCT	SEx %VCT	COUNT %VCT	STAND. DEV. %VCT
DECEMBER	0	0	5	0	0	0	5	0	0	0	5	0	100	0	5	0
JANUARY	0.15873	0.15873	6	0.388808	6.66667	2.96872	6	7.27185	0.47619	0.388808	6	0.952381	92.6984	3.34842	6	8.20191
FEBRUARY
MARCH	21.2925	11.428	7	30.2356	26.3946	7.36895	7	19.4964	3.40136	1.76172	7	4.66106	48.9116	9.45138	7	25.006
APRIL	54.8571	9.19096	10	29.0644	27	8.40672	10	26.5844	4.66667	3.24431	10	10.2594	13.4762	2.20063	10	6.95901
MAY	65.9524	9.09906	6	22.2881	28.6508	8.52139	6	20.873	1.19048	0.681801	6	1.67006	4.20635	0.890163	6	2.18045
JUNE
JULY	35.8095	16.5269	5	36.9553	61.619	16.2252	5	36.2806	0.952381	0.656383	5	1.46772	1.61905	0.731538	5	1.63577
AUGUST
SEPTEMBER	33.3333	33.3333	2	47.1405	13.8095	13.8095	2	19.5296	0.952381	0.952381	2	1.34687	51.9048	20.4762	2	28.9577
OCTOBER	3.88889	2.80486	6	6.87047	10.0794	3.4589	6	8.47253	1.03175	1.03175	6	2.52725	85	5.53522	6	13.5585
NOVEMBER	0.680272	0.680272	7	1.79983	6.73469	3.97382	7	10.5137	0	0	7	0	92.585	4.62835	7	12.2455

## Sheet: HISTOLOGIC COMPONENTS MALES
SEX	- todo -
MATURITY	- todo -
	Datos
MONTH	Promedio - %RG	Promedio - %RG	Promedio - %RG	Promedio - %UG	Promedio - %UG	Promedio - %UG	Promedio - %FS	Promedio - %FS	Promedio - %FS	Promedio - %VCT	Promedio - %VCT	Promedio - %VCT
ABRIL	49.7619	49.7619	49.7619	23.8889	23.8889	23.8889	15.1058	15.1058	15.1058	11.2434	11.2434	11.2434
DICIEMBRE	7.31293	7.31293	7.31293	17.2959	17.2959	17.2959	20.5442	20.5442	20.5442	54.8469	54.8469	54.8469
ENERO	7.30952	7.30952	7.30952	15.6905	15.6905	15.6905	23.5	23.5	23.5	53.5	53.5	53.5
JULIO	74.2297	74.2297	74.2297	18.6555	18.6555	18.6555	6.52661	6.52661	6.52661	0.588235	0.588235	0.588235
JUNIO	65.9259	65.9259	65.9259	4.49735	4.49735	4.49735	27.4603	27.4603	27.4603	2.1164	2.1164	2.1164
MARZO	32.328	32.328	32.328	24.8677	24.8677	24.8677	19.8942	19.8942	19.8942	22.9101	22.9101	22.9101
MAYO	72.7551	72.7551	72.7551	16.7687	16.7687	16.7687	6.76871	6.76871	6.76871	3.70748	3.70748	3.70748
NOVIEMBRE	3.10573	3.10573	3.10573	16.1576	16.1576	16.1576	16.1563	16.1563	16.1563	64.5804	64.5804	64.5804
OCTUBRE	7.64881	7.64881	7.64881	20.744	20.744	20.744	22.5893	22.5893	22.5893	49.0179	49.0179	49.0179
SEPTIEMBRE	49.0079	49.0079	49.0079	7.61905	7.61905	7.61905	18.373	18.373	18.373	25	25	25
Total Resultado	33.2325	33.2325	33.2325	17.5934	17.5934	17.5934	17.7066	17.7066	17.7066	31.4676	31.4676	31.4676

## Sheet: HISTOLOGIC COMPONENTS AND SE FEMALES
	%RG	SEx %RG	COUNT %RG	STAND. DEV. %RG	%UG	SEx %UG	COUNT %UG	STAND. DEV. %UG	%FS	SEx %FS	COUNT %FS	STAND. DEV. %FS	%VCT	SEx %VCT	COUNT %VCT	STAND. DEV. %VCT
DECEMBER	13.6508	1.14556	15	4.43674	32.2857	2.90259	15	11.2417	38.3492	3.20177	15	12.4004	15.7143	1.00855	15	3.90609
JANUARY	14.5238	0.707196	10	2.23635	27.381	1.36591	10	4.31939	46.7143	2.57559	10	8.14473	11.381	1.38278	10	4.37272
FEBRUARY
MARCH	39.3506	7.5855	11	25.1582	23.8961	3.15008	11	10.4476	30.3896	5.20961	11	17.2783	6.36364	1.7411	11	5.77457
APRIL	43.3929	6.86267	8	19.4106	20	6.33786	8	17.9262	28.1548	4.22619	8	11.9535	8.45238	2.37201	8	6.70905
MAY	77.8571	4.7551	8	13.4494	7.85714	2.58481	8	7.31095	10.9524	2.20617	8	6.23999	3.33333	0.719932	8	2.03628
JUNE	65.9259	5.41611	9	16.2483	4.49735	0.939433	9	2.8183	27.4603	5.15384	9	15.4615	2.1164	0.508873	9	1.52662
JULY	95.381	1.28767	10	4.07198	0.428571	0.328767	10	1.03965	4.19048	1.17031	10	3.70083	0	0	10	0
AUGUST
SEPTEMBER	56.3946	9.14015	7	24.1826	9.11565	3.08682	7	8.16695	31.2245	5.74337	7	15.1955	3.26531	2.38192	7	6.30198
OCTOBER	9.90476	1.33711	10	4.2283	27.1429	1.78174	10	5.63436	35.5238	2.51596	10	7.95617	27.4286	2.53193	10	8.00667
NOVEMBER	6.50137	0.672434	5	1.50361	29.3498	1.96453	5	4.39282	38.775	2.47594	5	5.53637	25.3738	1.85307	5	4.14359

## Sheet: HISTOLOGIC COMPONENTS FEMALES
SEX	- todo -
MATURITY	- todo -
	Datos
MONTH	Promedio - %RG	Promedio - %RG	Promedio - %RG	Promedio - %UG	Promedio - %UG	Promedio - %UG	Promedio - %FS	Promedio - %FS	Promedio - %FS	Promedio - %VCT	Promedio - %VCT	Promedio - %VCT
ABRIL	49.7619	49.7619	49.7619	23.8889	23.8889	23.8889	15.1058	15.1058	15.1058	11.2434	11.2434	11.2434
DICIEMBRE	7.31293	7.31293	7.31293	17.2959	17.2959	17.2959	20.5442	20.5442	20.5442	54.8469	54.8469	54.8469
ENERO	7.30952	7.30952	7.30952	15.6905	15.6905	15.6905	23.5	23.5	23.5	53.5	53.5	53.5
JULIO	74.2297	74.2297	74.2297	18.6555	18.6555	18.6555	6.52661	6.52661	6.52661	0.588235	0.588235	0.588235
JUNIO	65.9259	65.9259	65.9259	4.49735	4.49735	4.49735	27.4603	27.4603	27.4603	2.1164	2.1164	2.1164
MARZO	32.328	32.328	32.328	24.8677	24.8677	24.8677	19.8942	19.8942	19.8942	22.9101	22.9101	22.9101
MAYO	72.7551	72.7551	72.7551	16.7687	16.7687	16.7687	6.76871	6.76871	6.76871	3.70748	3.70748	3.70748
NOVIEMBRE	3.10573	3.10573	3.10573	16.1576	16.1576	16.1576	16.1563	16.1563	16.1563	64.5804	64.5804	64.5804
OCTUBRE	7.64881	7.64881	7.64881	20.744	20.744	20.744	22.5893	22.5893	22.5893	49.0179	49.0179	49.0179
SEPTIEMBRE	49.0079	49.0079	49.0079	7.61905	7.61905	7.61905	18.373	18.373	18.373	25	25	25
Total Resultado	33.2325	33.2325	33.2325	17.5934	17.5934	17.5934	17.7066	17.7066	17.7066	31.4676	31.4676	31.4676

## Sheet: DATABASE AND HISTOLOGIC COMPONENTS
CODE	SPECIES	LOCALITY	DATE OF CAPTURE	MONTH	SAMPLING	DATE OF SAMPLING	WEIGHT OF SAMPLING	LF (mm)	LFC (mm)	LIVE WEIGHT(g)	EVISCERATED WEIGHT (g)	SEX	MATURITY	GONAD WEIGHT (g)	LIVER WEIGHT (g)	IH	IG	K	Ke	STOMACH REPLETION	STOMACH WEIGHT (g)	OTOLITH	SPINE	VERTEBRAE	STOMACH	OBSERVATIONS	ELECTRONIC OBSERVATIONS	GONAD SAMPLE WEIGHT(gr)	GONAD CODE	RG	UG	FS	VCT	TOTAL	%RG	%UG	%FS	%VCT	%TOTAL
LTA	Euthynnus alletteratus	ANTON LIZARDO	2011-12-14	DICIEMBRE	21	2011-12-14	47740	450	465	1200	1120	1		0.75	36.6	3.14595	0.0625391	0.00131687	0.00122908	0	9.78	Ea14121101	Ea14121101	Ea14121101					LTA 14/12-1	0	0	0	210	210	0	0	0	100	100
LTA	Euthynnus alletteratus	ANTON LIZARDO	2011-12-14	DICIEMBRE	21	2011-12-14	47740	520	530	1840	1720	3	5	1.63	55.36	3.10203	0.0886655	0.0013086	0.00122326	0	22.66	Ea14121102	Ea14121102	Ea14121102					LTA 14/12-2	0	0	0	210	210	0	0	0	100	100
LTA	Euthynnus alletteratus	ANTON LIZARDO	2011-12-14	DICIEMBRE	21	2011-12-14	47740	540	560	2180	1920	1	5	2.08	74.47	3.53688	0.095504	0.00138444	0.00121933	0	148.64	Ea14121103	Ea14121103	Ea14121103					LTA 14/12-3	0	0	0	210	210	0	0	0	100	100
LTA	Euthynnus alletteratus	ANTON LIZARDO	2011-12-14	DICIEMBRE	21	2011-12-14	47740	457	490	1440	1320	3	5	1.5	48.72	3.50181	0.104275	0.00150874	0.00138301	0	13.24	Ea14121104	Ea14121104	Ea14121104					LTA 14/12-4	0	0	0	210	210	0	0	0	100	100
LTA	Euthynnus alletteratus	ANTON LIZARDO	2011-12-14	DICIEMBRE	21	2011-12-14	47740	525	546	2120	1980	1	5	1.84	66.44	3.23536	0.0868678	0.00146507	0.00136832	0	19.65	Ea14121105	Ea14121105	Ea14121105					LTA 14/12-5	0	0	0	210	210	0	0	0	100	100
LTA	Euthynnus alletteratus	ANTON LIZARDO	2011-12-14	DICIEMBRE	21	2011-12-14	47740	470	486	1500	1380	3	5	2.38	56.88	3.94146	0.158919	0.00144477	0.00132919	0	16.63	Ea14121106	Ea14121106	Ea14121106					LTA 14/12-6	0	0	0	210	210	0	0	0	100	100
LTA	Euthynnus alletteratus	ANTON LIZARDO	2011-12-14	DICIEMBRE	21	2011-12-14	47740	532	540	1980	1860	2	2	10.04	54.68	2.84005	0.509655	0.00131501	0.00123532	0	18.08	Ea14121107	Ea14121107	Ea14121107					LTA 14/12-7	27	83	66	34	210	12.8571	39.5238	31.4286	16.1905	100
LTA	Euthynnus alletteratus	ANTON LIZARDO	2011-12-14	DICIEMBRE	21	2011-12-14	47740	501	515	1700	1580	2	4	8.28	57.81	3.5203	0.489443	0.00135187	0.00125645	0	20.65	Ea14121108	Ea14121108	Ea14121108					LTA 14/12-8	18	60	102	30	210	8.57143	28.5714	48.5714	14.2857	100
LTA	Euthynnus alletteratus	ANTON LIZARDO	2011-12-14	DICIEMBRE	21	2011-12-14	47740	463	470	1400	1300	2	4	5.5	48.12	3.55949	0.394407	0.00141054	0.00130979	0	12.03	Ea14121109	Ea14121109	Ea14121109					LTA 14/12-9	48	107	21	34	210	22.8571	50.9524	10	16.1905	100
LTA	Euthynnus alletteratus	ANTON LIZARDO	2011-12-14	DICIEMBRE	21	2011-12-14	47740	476	490	1420	1320	2	4	2.37	35.7	2.57892	0.16718	0.00131664	0.00122392	0	14.97	Ea14121110	Ea14121110	Ea14121110					LTA 14/12-10	16	76	75	43	210	7.61905	36.1905	35.7143	20.4762	100
LTA	Euthynnus alletteratus	ANTON LIZARDO	2011-12-14	DICIEMBRE	21	2011-12-14	47740	580	600	2520	2340	2	4	7.75	77.62	3.17805	0.308488	0.00129157	0.00119931	0	48.47	Ea14121111	Ea14121111	Ea14121111					LTA 14/12-11	30	56	98	26	210	14.2857	26.6667	46.6667	12.381	100
LTA	Euthynnus alletteratus	ANTON LIZARDO	2011-12-14	DICIEMBRE	21	2011-12-14	47740	525	540	1980	1820	2	5	4.02	55.88	2.90418	0.203443	0.00136832	0.00125775	0	33.52	Ea14121112	Ea14121112	Ea14121112					LTA 14/12-12	20	49	98	43	210	9.52381	23.3333	46.6667	20.4762	100
LTA	Euthynnus alletteratus	ANTON LIZARDO	2011-12-14	DICIEMBRE	21	2011-12-14	47740	400	410	840	780	3	5	0.52	30.74	3.79853	0.0619431	0.0013125	0.00121875	0	10.68	Ea14121113	Ea14121113	Ea14121113					LTA 14/12-13	0	0	0	210	210	0	0	0	100	100
LTA	Euthynnus alletteratus	ANTON LIZARDO	2011-12-14	DICIEMBRE	21	2011-12-14	47740	455	465	1340	1240	2	5	5.64	49.27	3.81722	0.422675	0.00142256	0.0013164	0	12.05	Ea14121114	Ea14121114	Ea14121114					LTA 14/12-14	27	45	104	34	210	12.8571	21.4286	49.5238	16.1905	100
LTA	Euthynnus alletteratus	ANTON LIZARDO	2011-12-14	DICIEMBRE	21	2011-12-14	47740	385	400	840	780	2	5	3.69	24.27	2.97525	0.441224	0.00147196	0.00136682	0	8.98	Ea14121115	Ea14121115	Ea14121115					LTA 14/12-15	38	105	42	25	210	18.0952	50	20	11.9048	100
LTA	Euthynnus alletteratus	ANTON LIZARDO	2011-12-14	DICIEMBRE	21	2011-12-14	47740	465	470	1360	1280	3	5	0.81	36.51	2.75862	0.0595943	0.00135263	0.00127307	0	7.68	Ea14121116	Ea14121116	Ea14121116					LTA 14/12-16	0	0	0	210	210	0	0	0	100	100
LTA	Euthynnus alletteratus	ANTON LIZARDO	2011-12-14	DICIEMBRE	21	2011-12-14	47740	571	594	2800	2580	1	5	4.17	62.01	2.2648	0.149151	0.00150401	0.00138583	1	59.97	Ea14121117	Ea14121117	Ea14121117					LTA 14/12-17	0	0	0	210	210	0	0	0	100	100
LTA	Euthynnus alletteratus	ANTON LIZARDO	2011-12-14	DICIEMBRE	21	2011-12-14	47740	451	465	1340	1280	3	5	0.9	42.56	3.28031	0.0672093	0.00146075	0.00139534	0	9.31	Ea14121118	Ea14121118	Ea14121118					LTA 14/12-18	0	0	0	210	210	0	0	0	100	100
LTA	Euthynnus alletteratus	ANTON LIZARDO	2011-12-14	DICIEMBRE	21	2011-12-14	47740	547	560	2240	2100	1	5	1.46	71.43	3.29388	0.0652211	0.00136863	0.00128309	0	30.06	Ea14121119	Ea14121119	Ea14121119					LTA 14/12-19	0	0	0	210	210	0	0	0	100	100
LTA	Euthynnus alletteratus	ANTON LIZARDO	2011-12-14	DICIEMBRE	21	2011-12-14	47740	457	470	1420	1320	1	5	1.44	40.43	2.93062	0.101511	0.00148778	0.00138301	0	19.38	Ea14121120	Ea14121120	Ea14121120					LTA 14/12-20	0	0	0	210	210	0	0	0	100	100
LTA	Euthynnus alletteratus	ANTON LIZARDO	2011-12-14	DICIEMBRE	21	2011-12-14	47740	380	400	820	740	2	5	1.22	27.93	3.5262	0.149002	0.00149439	0.00134859	0	6.45	Ea14121121	Ea14121121	Ea14121121					LTA 14/12-21	32	92	59	27	210	15.2381	43.8095	28.0952	12.8571	100
LTA	Euthynnus alletteratus	ANTON LIZARDO	2011-12-14	DICIEMBRE	21	2011-12-14	47740	535	560	2160	1980	2	5	7.5	57.59	2.73924	0.348432	0.00141056	0.00129302	2	40.14	Ea14121122	Ea14121122	Ea14121122					LTA 14/12-22
LTA	Euthynnus alletteratus	ANTON LIZARDO	2011-12-14	DICIEMBRE	21	2011-12-14	47740	446	458	1360	1220	2	5	6.66	57.2	4.39054	0.492116	0.00153297	0.00137517	0	11.14	Ea14121123	Ea14121123	Ea14121123					LTA 14/12-23	41	46	87	36	210	19.5238	21.9048	41.4286	17.1429	100
LTA	Euthynnus alletteratus	ANTON LIZARDO	2011-12-14	DICIEMBRE	21	2011-12-14	47740	524	538	2020	1840	2	5	12.2	67.93	3.4799	0.60763	0.00140397	0.00127886	0	24.2	Ea14121124	Ea14121124	Ea14121124					LTA 14/12-24	20	49	89	52	210	9.52381	23.3333	42.381	24.7619	100
LTA	Euthynnus alletteratus	ANTON LIZARDO	2011-12-14	DICIEMBRE	21	2011-12-14	47740	488	500	1600	1500	3	5	2.09	50.4	3.25245	0.130796	0.00137677	0.00129072	0	12.01	Ea14121125	Ea14121125	Ea14121125					LTA 14/12-25	0	0	0	210	210	0	0	0	100	100
LTA	Euthynnus alletteratus	ANTON LIZARDO	2011-12-14	DICIEMBRE	21	2011-12-14	47740	546	553	2220	1960	2	5	7.53	49.66	2.28812	0.340344	0.00136388	0.00120414	2	125.7	Ea14121126	Ea14121126	Ea14121126					LTA 14/12-26	33	49	94	34	210	15.7143	23.3333	44.7619	16.1905	100
LTA	Euthynnus alletteratus	ANTON LIZARDO	2011-12-14	DICIEMBRE	21	2011-12-14	47740	446	460	1220	1120	2	5	4.41	38.68	3.2743	0.362787	0.00137517	0.00126245	0	13.47	Ea14121127	Ea14121127	Ea14121127					LTA 14/12-27	26	100	64	20	210	12.381	47.619	30.4762	9.52381	100
LTA	Euthynnus alletteratus	ANTON LIZARDO	2011-12-14	DICIEMBRE	21	2011-12-14	47740	484	494	1500	1380	2	5	6.33	46.75	3.21693	0.423788	0.00132299	0.00121715	0	13.41	Ea14121128	Ea14121128	Ea14121128					LTA 14/12-28	35	56	90	29	210	16.6667	26.6667	42.8571	13.8095	100
LTA	Euthynnus alletteratus	ANTON LIZARDO	2011-12-14	DICIEMBRE	21	2011-12-14	47740	490	502	1380	1280	2	5	2.07	34.32	2.55038	0.150225	0.00117298	0.00108798	1	42.71	Ea14121129	Ea14121129	Ea14121129					LTA 14/12-29	19	44	119	28	210	9.04762	20.9524	56.6667	13.3333	100
LTA	Euthynnus alletteratus	ANTON LIZARDO	2012-01-25	ENERO	22	2012-01-25	7360	393	407	900	780	2	2	2.1	42.22	4.92201	0.233879	0.00148274	0.00128504	0	10.35	Ea25011201	Ea25011201	Ea25011201					LTA 25/01-1	35	78	72	25	210	16.6667	37.1429	34.2857	11.9048	100
LTA	Euthynnus alletteratus	ANTON LIZARDO	2012-01-25	ENERO	22	2012-01-25	7360	526	536	2000	1820	1	2	2.67	66.13	3.41957	0.133678	0.00137427	0.00125059	2	104.31	Ea25011202	Ea25011202	Ea25011202					LTA 25/01-2	0	35	5	170	210	0	16.6667	2.38095	80.9524	100
LTA	Euthynnus alletteratus	ANTON LIZARDO	2012-01-25	ENERO	22	2012-01-25	7360	341	350	540	500	2	2	1.03	20.84	4.01418	0.191105	0.00136185	0.00126098	0	3.55	Ea25011203	Ea25011203	Ea25011203					LTA 25/01-3
LTA	Euthynnus alletteratus	ANTON LIZARDO	2012-01-25	ENERO	22	2012-01-25	7360	466	476	1360	1240	1	2	1.49	58.12	4.46431	0.109679	0.00134394	0.00122536	1	22.78	Ea25011204	Ea25011204	Ea25011204					LTA 25/01-4	0	0	0	210	210	0	0	0	100	100
LTA	Euthynnus alletteratus	ANTON LIZARDO	2012-01-25	ENERO	22	2012-01-25	7360	474	482	1420	1320	1	2	2.25	47.31	3.44652	0.158702	0.00133338	0.00123948	0	13.4	Ea25011205	Ea25011205	Ea25011205					LTA 25/01-5	2	28	1	179	210	0.952381	13.3333	0.47619	85.2381	100
LTA	Euthynnus alletteratus	ANTON LIZARDO	2012-01-25	ENERO	22	2012-01-25	7360	369	380	680	600	3	1	0.04	30.31	4.6653	0.0058827	0.00135341	0.00119419	0	5.9	Ea25011206	Ea25011206	Ea25011206					LTA 25/01-6	0	0	0	210	210	0	0	0	100	100
LTA	Euthynnus alletteratus	ANTON LIZARDO	2012-01-25	ENERO	22	2012-01-25	7360	312	319	460	400	3	1	0.08	20.83	4.74304	0.0173943	0.00151459	0.00131703	0	4.01	Ea25011207	Ea25011207	Ea25011207					LTA 25/01-7	0	0	0	210	210	0	0	0	100	100
LTA	Euthynnus alletteratus	ANTON LIZARDO	2012-01-31	ENERO	23	2012-01-31	26300	479	500	1580	1440	3	4	1.28	69.26	4.58451	0.0810783	0.00143764	0.00131026	0	13.39	Ea01021201	Ea01021201	Ea01021201					LTA 31/01-1	0	0	0	210	210	0	0	0	100	100
LTA	Euthynnus alletteratus	ANTON LIZARDO	2012-01-31	ENERO	23	2012-01-31	26300	490	517	1560	1440	3	4	1.07	60.23	4.01595	0.0686368	0.00132598	0.00122398	0	15.65	Ea01021202	Ea01021202	Ea01021202					LTA 31/01-2	0	0	0	210	210	0	0	0	100	100
LTA	Euthynnus alletteratus	ANTON LIZARDO	2012-01-31	ENERO	23	2012-01-31	26300	525	540	2000	1860	2	4	14.14	46.43	2.37667	0.712034	0.00138214	0.00128539	0	18.74	Ea01021203	Ea01021203	Ea01021203					LTA 31/01-3	38	51	102	19	210	18.0952	24.2857	48.5714	9.04762	100
LTA	Euthynnus alletteratus	ANTON LIZARDO	2012-01-31	ENERO	23	2012-01-31	26300	475	486	1480	1340	1	4	1.97	36.69	2.54207	0.133286	0.00138096	0.00125033	0	11.3	Ea01021204	Ea01021204	Ea01021204					LTA 31/01-4	0	3	0	207	210	0	1.42857	0	98.5714	100
LTA	Euthynnus alletteratus	ANTON LIZARDO	2012-01-31	ENERO	23	2012-01-31	26300	494	506	1720	1580	2	4	12.68	48.38	2.8942	0.742684	0.00142675	0.00131062	0	15.99	Ea01021205	Ea01021205	Ea01021205					LTA 31/01-5	26	53	101	30	210	12.381	25.2381	48.0952	14.2857	100
LTA	Euthynnus alletteratus	ANTON LIZARDO	2012-01-31	ENERO	23	2012-01-31	26300	546	565	2300	2120	2	4	15.07	107.95	4.92461	0.659539	0.00141303	0.00130244	0	26.94	Ea01021206	Ea01021206	Ea01021206					LTA 31/01-6	33	57	104	16	210	15.7143	27.1429	49.5238	7.61905	100
LTA	Euthynnus alletteratus	ANTON LIZARDO	2012-01-31	ENERO	23	2012-01-31	26300	523	537	1960	1820	2	4	7.83	70.68	3.74103	0.401092	0.0013701	0.00127223	0	24.52	Ea01021207	Ea01021207	Ea01021207					LTA 31/01-7	22	43	136	9	210	10.4762	20.4762	64.7619	4.28571	100
LTA	Euthynnus alletteratus	ANTON LIZARDO	2012-01-31	ENERO	23	2012-01-31	26300	505	523	1820	1660	1	4	2.16	58.66	3.33042	0.118822	0.00141318	0.00128894	0	23.3	Ea01021208	Ea01021208	Ea01021208					LTA 31/01-8	0	18	0	192	210	0	8.57143	0	91.4286	100
LTA	Euthynnus alletteratus	ANTON LIZARDO	2012-01-31	ENERO	23	2012-01-31	26300	525	545	2040	1840	2	4	13.04	71.72	3.64379	0.643328	0.00140978	0.00127157	0	24.64	Ea01021209	Ea01021209	Ea01021209					LTA 31/01-9	32	57	85	36	210	15.2381	27.1429	40.4762	17.1429	100
LTA	Euthynnus alletteratus	ANTON LIZARDO	2012-01-31	ENERO	23	2012-01-31	26300	510	524	1940	1780	2	4	11.29	77.04	4.13535	0.585365	0.00146248	0.00134187	0	25.4	Ea01021210	Ea01021210	Ea01021210					LTA 31/01-10	29	56	97	28	210	13.8095	26.6667	46.1905	13.3333	100
LTA	Euthynnus alletteratus	ANTON LIZARDO	2012-01-31	ENERO	23	2012-01-31	26300	540	564	2220	2040	2	4	16.95	74.72	3.483	0.769388	0.00140985	0.00129553	0	28.4	Ea01021211	Ea01021211	Ea01021211					LTA 31/01-11	33	57	82	38	210	15.7143	27.1429	39.0476	18.0952	100
LTA	Euthynnus alletteratus	ANTON LIZARDO	2012-01-31	ENERO	23	2012-01-31	26300	516	526	1860	1680	2	4	10.99	66.36	3.69974	0.594372	0.00135383	0.00122281	1	28.44	Ea01021212	Ea01021212	Ea01021212					LTA 31/01-12	30	59	103	18	210	14.2857	28.0952	49.0476	8.57143	100
LTA	Euthynnus alletteratus	ANTON LIZARDO	2012-01-31	ENERO	23	2012-01-31	26300	540	558	2180	1980	2	4	16.85	90.58	4.33517	0.778957	0.00138444	0.00125743	0	40.76	Ea01021213	Ea01021213	Ea01021213					LTA 31/01-13	27	64	99	20	210	12.8571	30.4762	47.1429	9.52381	100
LTA	Euthynnus alletteratus	ANTON LIZARDO	2012-01-31	ENERO	23	2012-01-31	26300	500	506	1640	1500	1	4	9.19	50.54	3.1797	0.563524	0.001312	0.0012	0	15.28	Ea01021214	Ea01021214	Ea01021214					LTA 31/01-14	0	0	0	210	210	0	0	0	100	100
LTA	Euthynnus alletteratus	ANTON LIZARDO	2012-03-16	MARZO	24	2012-03-16	25480	473	495	1420	1320	1	3	17.34	51.83	3.78827	1.23622	0.00134185	0.00124736	0	15.06								LTA 16/03-1	0	127	0	83	210	0	60.4762	0	39.5238	100
LTA	Euthynnus alletteratus	ANTON LIZARDO	2012-03-16	MARZO	24	2012-03-16	25480	461	479	1280	1200	2	2	26.39	47.27	3.83458	2.10512	0.00130649	0.00122484	0	14.87								LTA 16/03-2	169	25	15	1	210	80.4762	11.9048	7.14286	0.47619	100
LTA	Euthynnus alletteratus	ANTON LIZARDO	2012-03-16	MARZO	24	2012-03-16	25480	472	495	1340	1240	1	3	14.75	50.33	3.90255	1.113	0.00127432	0.00117922	0	11.81								LTA 16/03-3	61	70	0	79	210	29.0476	33.3333	0	37.619	100
LTA	Euthynnus alletteratus	ANTON LIZARDO	2012-03-16	MARZO	24	2012-03-16	25480	426	447	1020	960	1	3	8.65	36.96	3.75977	0.855292	0.00131938	0.00124177	0	9.01								LTA 16/03-4	51	74	0	85	210	24.2857	35.2381	0	40.4762	100
LTA	Euthynnus alletteratus	ANTON LIZARDO	2012-03-16	MARZO	24	2012-03-16	25480	454	471	1320	1240	2	2	11.73	42.51	3.32762	0.896604	0.00141061	0.00132512	0	9.53								LTA 16/03-5	88	41	75	6	210	41.9048	19.5238	35.7143	2.85714	100
LTA	Euthynnus alletteratus	ANTON LIZARDO	2012-03-16	MARZO	24	2012-03-16	25480	441	464	1220	1120	2	2	10.03	46.71	3.98111	0.828946	0.00142247	0.00130588	1	31.68								LTA 16/03-6	29	74	89	18	210	13.8095	35.2381	42.381	8.57143	100
LTA	Euthynnus alletteratus	ANTON LIZARDO	2012-03-16	MARZO	24	2012-03-16	25480	490	505	1540	1420	2	2	24.44	62.51	4.23082	1.61261	0.00130898	0.00120698	1	18.3								LTA 16/03-7	163	17	23	7	210	77.619	8.09524	10.9524	3.33333	100
LTA	Euthynnus alletteratus	ANTON LIZARDO	2012-03-16	MARZO	24	2012-03-16	25480	480	496	1440	1340	2	2	12.98	55.96	4.04324	0.909588	0.00130208	0.00121166	0	16.09								LTA 16/03-8	49	51	103	7	210	23.3333	24.2857	49.0476	3.33333	100
LTA	Euthynnus alletteratus	ANTON LIZARDO	2012-03-16	MARZO	24	2012-03-16	25480	494	512	1580	1460	2	2	22.28	61.56	4.05416	1.4303	0.00131062	0.00121108	0	17.58								LTA 16/03-9	147	32	25	6	210	70	15.2381	11.9048	2.85714	100
LTA	Euthynnus alletteratus	ANTON LIZARDO	2012-03-16	MARZO	24	2012-03-16	25480	490	500	1520	1420	2	2	17.79	49.06	3.33528	1.18426	0.00129198	0.00120698	0	18.07								LTA 16/03-10	40	44	95	31	210	19.0476	20.9524	45.2381	14.7619	100
LTA	Euthynnus alletteratus	ANTON LIZARDO	2012-03-16	MARZO	24	2012-03-16	25480	475	487	1420	1300	2	2	16.27	44.95	3.26897	1.15905	0.00132497	0.001213	1	19.1								LTA 16/03-11	74	83	17	36	210	35.2381	39.5238	8.09524	17.1429	100
LTA	Euthynnus alletteratus	ANTON LIZARDO	2012-03-16	MARZO	24	2012-03-16	25480	459	477	1360	1260	1	3	25.01	52.21	3.99223	1.87342	0.00140637	0.00130296	0	14.74								LTA 16/03-12	7	43	16	144	210	3.33333	20.4762	7.61905	68.5714	100
LTA	Euthynnus alletteratus	ANTON LIZARDO	2012-03-16	MARZO	24	2012-03-16	25480	462	474	1280	1180	1	3	22.23	40.45	3.26328	1.76741	0.00129803	0.00119662	1	18.1								LTA 16/03-13	7	20	0	183	210	3.33333	9.52381	0	87.1429	100
LTA	Euthynnus alletteratus	ANTON LIZARDO	2012-03-16	MARZO	24	2012-03-16	25480	425	445	1040	980	2	2	11.12	40.05	4.0052	1.08079	0.00135477	0.00127661	0	14.27								LTA 16/03-14	32	73	98	7	210	15.2381	34.7619	46.6667	3.33333	100
LTA	Euthynnus alletteratus	ANTON LIZARDO	2012-03-16	MARZO	24	2012-03-16	25480	449	466	1200	1120	1	2	6.6	42.75	3.6941	0.553042	0.00132569	0.00123731	1	14.69								LTA 16/03-15
LTA	Euthynnus alletteratus	ANTON LIZARDO	2012-03-16	MARZO	24	2012-03-16	25480	479	491	1420	1300	2	2	18.83	43.71	3.17593	1.34388	0.00129206	0.00118287	0	16.8								LTA 16/03-16	48	70	67	25	210	22.8571	33.3333	31.9048	11.9048	100
LTA	Euthynnus alletteratus	ANTON LIZARDO	2012-03-16	MARZO	24	2012-03-16	25480	465	481	1300	1220	2	2	19.41	47.73	3.81148	1.51571	0.00129296	0.00121339	0	13.64								LTA 16/03-17	70	42	95	3	210	33.3333	20	45.2381	1.42857	100
LTA	Euthynnus alletteratus	ANTON LIZARDO	2012-03-16	MARZO	24	2012-03-16	25480	465	484	1440	1320	1	3	14.48	59.88	4.33875	1.01577	0.0014322	0.00131285	0	13.84								LTA 16/03-18	178	1	10	21	210	84.7619	0.47619	4.7619	10	100
LTA	Euthynnus alletteratus	ANTON LIZARDO	2012-03-16	MARZO	24	2012-03-16	25480	463	483	1340	1240	1	3	15.99	58.86	4.59435	1.20769	0.00135009	0.00124933	0	14.12								LTA 16/03-19	9	53	24	124	210	4.28571	25.2381	11.4286	59.0476	100
LTA	Euthynnus alletteratus	ANTON LIZARDO	2012-04-16	ABRIL	25	2012-04-16	27040	474	494	1540	1380	2	2	24.16	73.93	5.04273	1.59384	0.00144606	0.00129582	0	20.25							0.95	LTA 16/04-1	142	23	43	2	210	67.619	10.9524	20.4762	0.952381	100
LTA	Euthynnus alletteratus	ANTON LIZARDO	2012-04-16	ABRIL	25	2012-04-16	27040	444	462	1380	1240	2	2	34.08	41.74	3.11898	2.5321	0.00157663	0.00141668	0	8.68							2.28	LTA 16/04-2
LTA	Euthynnus alletteratus	ANTON LIZARDO	2012-04-16	ABRIL	25	2012-04-16	27040	430	450	1240	1140	1	3	20.71	56.31	4.75716	1.69853	0.00155961	0.00143384	0	14.19							1.05	LTA 16/04-3	184	0	0	26	210	87.619	0	0	12.381	100
LTA	Euthynnus alletteratus	ANTON LIZARDO	2012-04-16	ABRIL	25	2012-04-16	27040	438	458	1300	1180	1	3	32.57	37.06	2.93442	2.56977	0.00154711	0.0014043	0	8.84							1.86	LTA 16/04-4	151	16	14	29	210	71.9048	7.61905	6.66667	13.8095	100
LTA	Euthynnus alletteratus	ANTON LIZARDO	2012-04-16	ABRIL	25	2012-04-16	27040	511	525	1760	1620	2	2	19.11	82.48	4.91678	1.09771	0.00131902	0.00121409	0	29.89							2.47	LTA 16/04-5	82	40	70	18	210	39.0476	19.0476	33.3333	8.57143	100
LTA	Euthynnus alletteratus	ANTON LIZARDO	2012-04-16	ABRIL	25	2012-04-16	27040	434	448	1200	1100	2	2	19.21	50.94	4.43319	1.62688	0.00146795	0.00134562	0	8.29							1.56	LTA 16/04-6	92	7	109	2	210	43.8095	3.33333	51.9048	0.952381	100
LTA	Euthynnus alletteratus	ANTON LIZARDO	2012-04-16	ABRIL	25	2012-04-16	27040	470	490		1340	1	3	20.28	69.72					0	21.41							1.11	LTA 16/04-7	185	8	1	16	210	88.0952	3.80952	0.47619	7.61905	100
LTA	Euthynnus alletteratus	ANTON LIZARDO	2012-04-16	ABRIL	25	2012-04-16	27040	480	510	1740	1620	2	3	28.77	39.99	2.35234	1.68125	0.00157335	0.00146484	0	10.95							0.65	LTA 16/04-8	36	122	22	30	210	17.1429	58.0952	10.4762	14.2857	100
LTA	Euthynnus alletteratus	ANTON LIZARDO	2012-04-16	ABRIL	25	2012-04-16	27040	388	408	880	800	1	3	13.49	35.49	4.20244	1.55682	0.00150656	0.0013696	0	8.12							0.74	LTA 16/04-9	136	74	0	0	210	64.7619	35.2381	0	0	100
LTA	Euthynnus alletteratus	ANTON LIZARDO	2012-04-16	ABRIL	25	2012-04-16	27040	430	450	1320	1180	2	2	30.64	58.82	4.66389	2.37637	0.00166023	0.00148415	0	15.87							2.69	LTA 16/04-10
LTA	Euthynnus alletteratus	ANTON LIZARDO	2012-04-16	ABRIL	25	2012-04-16	27040	465	486	1500	1360	2	2	20.09	83.68	5.90827	1.35751	0.00149187	0.00135263	0	28.48							1.13	LTA 16/04-11	88	44	53	25	210	41.9048	20.9524	25.2381	11.9048	100
LTA	Euthynnus alletteratus	ANTON LIZARDO	2012-04-16	ABRIL	25	2012-04-16	27040	480	490	1420	1300	2	2	22.7	77.62	5.78227	1.62456	0.001284	0.00117549	0	14.39							0.8	LTA 16/04-12	128	16	58	8	210	60.9524	7.61905	27.619	3.80952	100
LTA	Euthynnus alletteratus	ANTON LIZARDO	2012-04-16	ABRIL	25	2012-04-16	27040	480	495	1560	1420	1	3	14.94	72.97	4.9071	0.966953	0.00141059	0.001284	0	23.16							1.65	LTA 16/04-13	0	170	4	36	210	0	80.9524	1.90476	17.1429	100
LTA	Euthynnus alletteratus	ANTON LIZARDO	2012-04-16	ABRIL	25	2012-04-16	27040	470	485	1520	1380	1	3	22.46	60.58	4.15096	1.49979	0.00146403	0.00132919	0	16.72							6.27	LTA 16/04-14	117	69	2	22	210	55.7143	32.8571	0.952381	10.4762	100
LTA	Euthynnus alletteratus	ANTON LIZARDO	2012-04-16	ABRIL	25	2012-04-16	27040	554	572	2280	2120	1	2	29.26	82.9	3.77316	1.30002	0.00134093	0.00124683	1	24.88					Se rompioò el estòmago		3.6	LTA 16/04-15	60	55	70	25	210	28.5714	26.1905	33.3333	11.9048	100
LTA	Euthynnus alletteratus	ANTON LIZARDO	2012-04-16	ABRIL	25	2012-04-16	27040	464	482	1400	1280	2	2	15.07	79.51	6.02125	1.08814	0.00140144	0.00128132	0	16.99					1		3.95	LTA 16/04-16	34	67	67	42	210	16.1905	31.9048	31.9048	20	100
LTA	Euthynnus alletteratus	ANTON LIZARDO	2012-04-16	ABRIL	25	2012-04-16	27040	454	465	1400	1280	1	3	28.85	48.28	3.57175	2.10407	0.0014961	0.00136786	0	10.8							1.6	LTA 16/04-17	135	20	1	54	210	64.2857	9.52381	0.47619	25.7143	100
LTA	Euthynnus alletteratus	ANTON LIZARDO	2012-04-16	ABRIL	25	2012-04-16	27040	462	480	1580	1420	1	2	57.78	85.72	5.73654	3.79577	0.00160225	0.00144	0	22.01							1.6	LTA 16/04-18	139	26	4	41	210	66.1905	12.381	1.90476	19.5238	100
LTA	Euthynnus alletteratus	ANTON LIZARDO	2012-04-16	ABRIL	25	2012-04-16	27040	440	460	1540	1220	2	2	30.08	67.47	4.58191	1.99216	0.00180785	0.00143219	0	13.6							3.57	LTA 16/04-19	127	17	51	15	210	60.4762	8.09524	24.2857	7.14286	100
LTA	Euthynnus alletteratus	ANTON LIZARDO	2012-04-16	ABRIL	25	2012-04-16	27040	370	355	680	620	1	3	22.72	26.53	4.05987	3.45667	0.00134247	0.00122401	0	5.5							0.65	LTA 16/04-20	45	129	2	34	210	21.4286	61.4286	0.952381	16.1905	100
LTA	Euthynnus alletteratus	ANTON LIZARDO	2012-05-28	MAYO	26	2012-05-28	26590	490	506	1640	1460	2	2	28.83	49.84	3.13428	1.78938	0.00139398	0.00124098									1.29	LTA 28/05-1	182	11	17	0	210	86.6667	5.2381	8.09524	0	100
LTA	Euthynnus alletteratus	ANTON LIZARDO	2012-05-28	MAYO	26	2012-05-28	26590	484	495	1620	1480	2	2	25.31	53.23	3.39744	1.58714	0.00142882	0.00130535									1.5	LTA 28/05-2	144	31	27	8	210	68.5714	14.7619	12.8571	3.80952	100
LTA	Euthynnus alletteratus	ANTON LIZARDO	2012-05-28	MAYO	26	2012-05-28	26590	510	524	1780	1620	1	3	33.61	56.01	3.24886	1.92454	0.00134187	0.00122125									1.17	LTA 28/05-3	155	46	1	8	210	73.8095	21.9048	0.47619	3.80952	100
LTA	Euthynnus alletteratus	ANTON LIZARDO	2012-05-28	MAYO	26	2012-05-28	26590	491	515	1740	1560	2	2	60.82	83.69	5.0528	3.62201	0.00146996	0.00131789									3.32	LTA 28/05-4	182	5	14	9	210	86.6667	2.38095	6.66667	4.28571	100
LTA	Euthynnus alletteratus	ANTON LIZARDO	2012-05-28	MAYO	26	2012-05-28	26590	494	518	1770	1540	1	3	45.4	67.33	3.95438	2.63249	0.00146822	0.00127744									1.56	LTA 28/05-5	77	125	4	4	210	36.6667	59.5238	1.90476	1.90476	100
LTA	Euthynnus alletteratus	ANTON LIZARDO	2012-05-28	MAYO	26	2012-05-28	26590	556	576	2340	2120	2	2	41.76	87.28	3.87443	1.81704	0.00136142	0.00123342									1.13	LTA 28/05-6	139	25	41	5	210	66.1905	11.9048	19.5238	2.38095	100
LTA	Euthynnus alletteratus	ANTON LIZARDO	2012-05-28	MAYO	26	2012-05-28	26590	528	542	1940	1740	2	2	68.49	63.15	3.36468	3.65961	0.00131795	0.00118208									1.79	LTA 28/05-7	174	0	27	9	210	82.8571	0	12.8571	4.28571	100
LTA	Euthynnus alletteratus	ANTON LIZARDO	2012-05-28	MAYO	26	2012-05-28	26590	520	545	2100	1880	2	2	66.39	97.28	4.85739	3.26464	0.00149351	0.00133705									1.65	LTA 28/05-8	166	12	21	11	210	79.0476	5.71429	10	5.2381	100
LTA	Euthynnus alletteratus	ANTON LIZARDO	2012-05-28	MAYO	26	2012-05-28	26590	400	411	900	840	1	2	10.06	39.98	4.64873	1.13041	0.00140625	0.0013125									0.4	LTA 28/05-9	164	33	1	12	210	78.0952	15.7143	0.47619	5.71429	100
LTA	Euthynnus alletteratus	ANTON LIZARDO	2012-05-28	MAYO	26	2012-05-28	26590	508	520	1720	1580	2	5	21.29	46.69	2.79028	1.2533	0.00131201	0.00120522									0.78	LTA 28/05-10	117	44	37	12	210	55.7143	20.9524	17.619	5.71429	100
LTA	Euthynnus alletteratus	ANTON LIZARDO	2012-05-28	MAYO	26	2012-05-28	26590	430	445	1060	940	1	3	40.43	39.27	3.84725	3.9654	0.00133322	0.00118229									0.6	LTA 28/05-11	96	93	9	12	210	45.7143	44.2857	4.28571	5.71429	100
LTA	Euthynnus alletteratus	ANTON LIZARDO	2012-05-28	MAYO	26	2012-05-28	26590	620	650	3740	3340	1	3	182.6	112.03	3.08795	5.13296	0.00156927	0.00140143									4.78	LTA 28/05-12	134	62	0	14	210	63.8095	29.5238	0	6.66667	100
LTA	Euthynnus alletteratus	ANTON LIZARDO	2012-05-28	MAYO	26	2012-05-28	26590	470	490	1580	1420	2	2	51.15	51.52	3.37067	3.34565	0.00152182	0.00136771									1.62	LTA 28/05-13
LTA	Euthynnus alletteratus	ANTON LIZARDO	2012-05-28	MAYO	26	2012-05-28	26590	490	505	1600	1440	2	2	37.78	63.8	4.15311	2.41835	0.00135998	0.00122398									0.77	LTA 28/05-14	204	4	0	2	210	97.1429	1.90476	0	0.952381	100
LTA	Euthynnus alletteratus	ANTON LIZARDO	2012-05-28	MAYO	26	2012-05-28	26590	429	441	1060	960	1	3	30.1	33.17	3.23033	2.92261	0.00134256	0.0012159									0.65	LTA 28/05-15	205	2	0	3	210	97.619	0.952381	0	1.42857	100
LTA	Euthynnus alletteratus	ANTON LIZARDO	2012-07-20	JULIO	27	2012-07-20	24680	450	465	1480	1320	2	3	62.97	78.14	5.57402	4.4438	0.00162414	0.00144856									1.77	LTA 20/07-1	192	0	18	0	210	91.4286	0	8.57143	0	100
LTA	Euthynnus alletteratus	ANTON LIZARDO	2012-07-20	JULIO	27	2012-07-20	24680	500	509	1940	1720	1	3	97.06	81.23	4.37009	5.26658	0.001552	0.001376									1.96	LTA 20/07-2	192	18	0	0	210	91.4286	8.57143	0	0	100
LTA	Euthynnus alletteratus	ANTON LIZARDO	2012-07-20	JULIO	27	2012-07-20	24680	494	520	1940	1620	2	3	105.18	109.1	5.95882	5.73244	0.00160924	0.0013438									4.34	LTA 20/07-3	210	0	0	0	210	100	0	0	0	100
LTA	Euthynnus alletteratus	ANTON LIZARDO	2012-07-20	JULIO	27	2012-07-20	24680	402	424	1000	900	2	2	22	53.22	5.62116	2.24949	0.00153929	0.00138537									0.95	LTA 20/07-4	191	7	12	0	210	90.9524	3.33333	5.71429	0	100
LTA	Euthynnus alletteratus	ANTON LIZARDO	2012-07-20	JULIO	27	2012-07-20	24680	560	586	2620	2360	2	3	87.17	85.83	3.38691	3.4416	0.00149189	0.00134384									2.95	LTA 20/07-5	202	0	8	0	210	96.1905	0	3.80952	0	100
LTA	Euthynnus alletteratus	ANTON LIZARDO	2012-07-20	JULIO	27	2012-07-20	24680	486	510	1900	1620	2	3	75.99	72.62	3.974	4.1661	0.00165518	0.00141126									2.01	LTA 20/07-6	207	0	3	0	210	98.5714	0	1.42857	0	100
LTA	Euthynnus alletteratus	ANTON LIZARDO	2012-07-20	JULIO	27	2012-07-20	24680	420	434	1160	1040	2	1	25.37	55.06	4.98308	2.23597	0.00156571	0.00140374									1.52	LTA 20/07-7	185	0	25	0	210	88.0952	0	11.9048	0	100
LTA	Euthynnus alletteratus	ANTON LIZARDO	2012-07-20	JULIO	27	2012-07-20	24680	652	670	3700	3440	1	3	92.33	90.22	2.49932	2.55927	0.00133493	0.00124113									1.8	LTA 20/07-8	13	184	7	6	210	6.19048	87.619	3.33333	2.85714	100
LTA	Euthynnus alletteratus	ANTON LIZARDO	2012-07-20	JULIO	27	2012-07-20	24680	405	421	1060	940	2	3	43.24	42.75	4.20251	4.25272	0.00159566	0.00141502									1.64	LTA 20/07-9	210	0	0	0	210	100	0	0	0	100
LTA	Euthynnus alletteratus	ANTON LIZARDO	2012-07-20	JULIO	27	2012-07-20	24680	406	422	980	860	2	3	30.27	50	5.37634	3.18722	0.00146436	0.00128505									1.11	LTA 20/07-10	189	1	20	0	210	90	0.47619	9.52381	0	100
LTA	Euthynnus alletteratus	ANTON LIZARDO	2012-07-20	JULIO	27	2012-07-20	24680	373	394	880	760	2	3	42.95	38.52	4.57765	5.13112	0.00169573	0.00146449									1.91	LTA 20/07-11	210	0	0	0	210	100	0	0	0	100
LTA	Euthynnus alletteratus	ANTON LIZARDO	2012-07-20	JULIO	27	2012-07-20	24680	408	424	1020	940	1	3	34.25	32.05	3.24409	3.47451	0.00150183	0.00138404									0.86	LTA 20/07-12	50	158	0	2	210	23.8095	75.2381	0	0.952381	100
LTA	Euthynnus alletteratus	ANTON LIZARDO	2012-07-20	JULIO	27	2012-07-20	24680	406	427	1060	980	1	2	30.56	48.76	4.8218	2.9686	0.0015839	0.00146436									0.67	LTA 20/07-13	113	86	3	8	210	53.8095	40.9524	1.42857	3.80952	100
LTA	Euthynnus alletteratus	ANTON LIZARDO	2012-07-20	JULIO	27	2012-07-20	24680	415	430	1000	880	2	2	26.27	44.79	4.68902	2.69787	0.00139912	0.00123123									1.28	LTA 20/07-14	194	0	16	0	210	92.381	0	7.61905	0	100
LTA	Euthynnus alletteratus	ANTON LIZARDO	2012-07-20	JULIO	27	2012-07-20	24680	406	424	980	900	1	3	32.2	35.62	3.77179	3.39734	0.00146436	0.00134482									1.35	LTA 20/07-15	8	201	0	1	210	3.80952	95.7143	0	0.47619	100
LTA	Euthynnus alletteratus	ANTON LIZARDO	2012-07-20	JULIO	27	2012-07-20	24680	411	432	1020	940	2	1	9.96	55.39	5.74222	0.9861	0.00146918	0.00135395									0.41	LTA 20/07-16	86	10	110	4	210	40.9524	4.7619	52.381	1.90476	100
LTA	Euthynnus alletteratus	ANTON LIZARDO	2012-07-20	JULIO	27	2012-07-20	24680	380	404	940	840	2	3	46.59	47.08	5.27259	5.21485	0.00171308	0.00153084									1.62	LTA 20/07-17	198	1	11	0	210	94.2857	0.47619	5.2381	0	100
LTA	Euthynnus alletteratus	NO SE SABE	2012-09-21	SEPTIEMBRE	28	2012-09-21	2720	400	417	940	840	2	1	5.45	40.86	4.54434	0.583168	0.00146875	0.0013125									0.41	LTA 21/09-1
LTA	Euthynnus alletteratus	NO SE SABE	2012-09-21	SEPTIEMBRE	28	2012-09-21	2720	419	432	960	880	2	1	5.7	42.61	4.6447	0.597296	0.00130506	0.0011963									1.11	LTA 21/09-2
LTA	Euthynnus alletteratus	NO SE SABE	2012-09-21	SEPTIEMBRE	28	2012-09-21	2720	391	410	820	760	3	1	3.46	27.6	3.48309	0.423739	0.00137178	0.0012714									0.22	LTA 21/09-3	0	0	0	210	210	0	0	0	100	100
LTA	Euthynnus alletteratus	NO SE SABE	2012-09-22	SEPTIEMBRE	29	2012-09-22	20900	545	568	2160	1980	2	5	16.99	69.2	3.30974	0.79281	0.00133433	0.00122314									0.96	LTA 22/09-1
LTA	Euthynnus alletteratus	NO SE SABE	2012-09-22	SEPTIEMBRE	29	2012-09-22	20900	492	514	1760	1640	1	5	15.99	45.72	2.66701	0.916853	0.00147781	0.00137705									0.36	LTA 22/09-2	140	0	4	66	210	66.6667	0	1.90476	31.4286	100
LTA	Euthynnus alletteratus	NO SE SABE	2012-09-22	SEPTIEMBRE	29	2012-09-22	20900	481	500	1680	1480	2	3	47.65	48.69	2.98472	2.9191	0.00150964	0.00132992									1.22	LTA 22/09-3	168	0	42	0	210	80	0	20	0	100
LTA	Euthynnus alletteratus	NO SE SABE	2012-09-22	SEPTIEMBRE	29	2012-09-22	20900	460	478	1420	1280	1	5	12.74	39.42	2.85532	0.905305	0.00145886	0.00131503									0.29	LTA 22/09-4	0	58	0	152	210	0	27.619	0	72.381	100
LTA	Euthynnus alletteratus	NO SE SABE	2012-09-22	SEPTIEMBRE	29	2012-09-22	20900	444	456	1060	1000	1	1	8.95	34.52	3.36623	0.851529	0.00121104	0.00114249									0.37	LTA 22/09-5	77	0	0	133	210	36.6667	0	0	63.3333	100
LTA	Euthynnus alletteratus	NO SE SABE	2012-09-22	SEPTIEMBRE	29	2012-09-22	20900	479	500	1660	1500	2	5	13.58	55.79	3.47772	0.82482	0.00151043	0.00136485									0.51	LTA 22/09-6	38	36	100	36	210	18.0952	17.1429	47.619	17.1429	100
LTA	Euthynnus alletteratus	NO SE SABE	2012-09-22	SEPTIEMBRE	29	2012-09-22	20900	543	564	2200	1980	2	3	74.38	60.08	2.80758	3.49921	0.00137412	0.0012367									3.41	LTA 22/09-7	142	10	57	1	210	67.619	4.7619	27.1429	0.47619	100
LTA	Euthynnus alletteratus	NO SE SABE	2012-09-22	SEPTIEMBRE	29	2012-09-22	20900	525	548	1980	1780	2	3	78.19	57.13	2.97108	4.11135	0.00136832	0.0012301									1.98	LTA 22/09-8	92	7	111	0	210	43.8095	3.33333	52.8571	0	100
LTA	Euthynnus alletteratus	NO SE SABE	2012-09-22	SEPTIEMBRE	29	2012-09-22	20900	512	525	1800	1660	2	5	16	53.78	3.0798	0.896861	0.0013411	0.0012368									0.41	LTA 22/09-9	73	47	81	9	210	34.7619	22.381	38.5714	4.28571	100
LTA	Euthynnus alletteratus	NO SE SABE	2012-09-22	SEPTIEMBRE	29	2012-09-22	20900	565	580	2300	2060	2	3	101.38	80.86	3.64375	4.61107	0.00127521	0.00114215									2.49	LTA 22/09-10	165	10	34	1	210	78.5714	4.7619	16.1905	0.47619	100
LTA	Euthynnus alletteratus	NO SE SABE	2012-09-22	SEPTIEMBRE	29	2012-09-22	20900	514	534	1780	1600	2	3	50.58	60.23	3.50221	2.92468	0.00131078	0.00117823									2.35	LTA 22/09-11	151	24	34	1	210	71.9048	11.4286	16.1905	0.47619	100
LTA	Euthynnus alletteratus	NO SE SABE	2012-09-22	SEPTIEMBRE	29	2012-09-22	20900	444	460	1100	1020	1	1	8.1	31.43	2.94131	0.741826	0.00125674	0.00116534									0.77	LTA 22/09-12	189	0	0	21	210	90	0	0	10	100
LTA	Euthynnus alletteratus	NO SE SABE	2012-10-22	OCTUBRE	30	2012-10-23	25020	455	478	1400	1260	1	2	2.09	44.6	3.29054	0.149509	0.00148626	0.00133763									0.17	LTA 23/10-1	36	41	0	133	210	17.1429	19.5238	0	63.3333	100
LTA	Euthynnus alletteratus	NO SE SABE	2012-10-22	OCTUBRE	30	2012-10-23	25020	459	477	1480	1360	2	2	5.1	52.78	3.6981	0.345786	0.00153047	0.00140637									0.54	LTA 23/10-2	22	52	77	59	210	10.4762	24.7619	36.6667	28.0952	100
LTA	Euthynnus alletteratus	NO SE SABE	2012-10-22	OCTUBRE	30	2012-10-23	25020	452	474	1420	1300	1	2	1.64	34.58	2.49599	0.115626	0.00153771	0.00140776									0.1	LTA 23/10-3	1	18	0	191	210	0.47619	8.57143	0	90.9524	100
LTA	Euthynnus alletteratus	NO SE SABE	2012-10-22	OCTUBRE	30	2012-10-23	25020	465	480	1520	1400	1	2	0.94	52.32	3.56481	0.0618804	0.00151177	0.00139242									0.07	LTA 23/10-4	0	41	13	156	210	0	19.5238	6.19048	74.2857	100
LTA	Euthynnus alletteratus	NO SE SABE	2012-10-22	OCTUBRE	30	2012-10-23	25020	525	535	2140	1960	2	5	10.1	81.77	3.97283	0.474201	0.00147889	0.0013545									0.9	LTA 23/10-5	6	63	54	87	210	2.85714	30	25.7143	41.4286	100
LTA	Euthynnus alletteratus	NO SE SABE	2012-10-22	OCTUBRE	30	2012-10-23	25020	445	465	1340	1200	2	2	3.19	47.71	3.6919	0.238628	0.00152063	0.00136176									0.18	LTA 23/10-6	28	41	83	58	210	13.3333	19.5238	39.5238	27.619	100
LTA	Euthynnus alletteratus	NO SE SABE	2012-10-22	OCTUBRE	30	2012-10-23	25020	455	479	1380	1280	2	2	4.44	38.86	2.89753	0.322778	0.00146502	0.00135886									0.42	LTA 23/10-7	21	42	82	65	210	10	20	39.0476	30.9524	100
LTA	Euthynnus alletteratus	NO SE SABE	2012-10-22	OCTUBRE	30	2012-10-23	25020	476	495	1620	1480	1	2	3.02	71.48	4.61602	0.186768	0.00150208	0.00137227									0.22	LTA 23/10-8	0	24	0	186	210	0	11.4286	0	88.5714	100
LTA	Euthynnus alletteratus	NO SE SABE	2012-10-22	OCTUBRE	30	2012-10-23	25020	488	506	1780	1640	2	2	5.92	65.12	3.79735	0.333694	0.00153165	0.00141119									0.9	LTA 23/10-9	31	64	92	23	210	14.7619	30.4762	43.8095	10.9524	100
LTA	Euthynnus alletteratus	NO SE SABE	2012-10-22	OCTUBRE	30	2012-10-23	25020	486	502	1780	1640	1	2	2.07	44.68	2.57474	0.116428	0.00155064	0.00142868									0.24	LTA 23/10-10	12	3	0	195	210	5.71429	1.42857	0	92.8571	100
LTA	Euthynnus alletteratus	NO SE SABE	2012-10-22	OCTUBRE	30	2012-10-23	25020	456	480	1420	1300	2	2	5.15	48.31	3.52193	0.363996	0.00149759	0.00137104									0.43	LTA 23/10-11	24	79	37	70	210	11.4286	37.619	17.619	33.3333	100
LTA	Euthynnus alletteratus	NO SE SABE	2012-10-22	OCTUBRE	30	2012-10-23	25020	474	490	1600	1440	1	2	2.1	63.15	4.10905	0.131422	0.0015024	0.00135216									0.35	LTA 23/10-12	0	0	0	210	210	0	0	0	100	100
LTA	Euthynnus alletteratus	NO SE SABE	2012-10-22	OCTUBRE	30	2012-10-23	25020	452	474	1400	1280	2	2	5.25	47.13	3.48371	0.376412	0.00151605	0.0013861									0.91	LTA 23/10-13	20	54	89	47	210	9.52381	25.7143	42.381	22.381	100
LTA	Euthynnus alletteratus	NO SE SABE	2012-10-22	OCTUBRE	30	2012-10-23	25020	483	509	1680	1540	2	2	7.04	50.32	3.08772	0.420811	0.00149097	0.00136672									0.4	LTA 23/10-14	33	53	76	48	210	15.7143	25.2381	36.1905	22.8571	100
LTA	Euthynnus alletteratus	NO SE SABE	2012-10-22	OCTUBRE	30	2012-10-23	25020	480	498	1600	1460	2	2	5.53	57.87	3.7526	0.346824	0.00144676	0.00132017									0.62	LTA 23/10-15	11	69	76	54	210	5.2381	32.8571	36.1905	25.7143	100
LTA	Euthynnus alletteratus	NO SE SABE	2012-10-22	OCTUBRE	30	2012-10-23	25020	464	485	1460	1340	2	2	3.07	38.97	2.74238	0.210717	0.0014615	0.00134138									0.5	LTA 23/10-16	12	53	80	65	210	5.71429	25.2381	38.0952	30.9524	100
LTA	Euthynnus alletteratus	NO SE SABE	2012-11-23	NOVIEMBRE	31	2012-11-23	26760	461	475	1400	1240	1	2	0.99	36.95	2.71083	0.0707643	0.00142898	0.00126567									0.11	LTA 23/11-1	0	0	0	210	210	0	0	0	100	100
LTA	Euthynnus alletteratus	NO SE SABE	2012-11-23	NOVIEMBRE	31	2012-11-23	26760	576	592	2760	2520	2	2	8.23	74.46	2.77263	0.29908	0.00144425	0.00131866									0.49	LTA 23/11-2
LTA	Euthynnus alletteratus	NO SE SABE	2012-11-23	NOVIEMBRE	31	2012-11-23	26760	476	494	1420	1340	2	2	5.44	30.5	2.19503	0.384572	0.00131664	0.00124246									0.37	LTA 23/11-3
LTA	Euthynnus alletteratus	NO SE SABE	2012-11-23	NOVIEMBRE	31	2012-11-23	26760	466	479	1280	1200	2	2	5.9	26.83	2.14097	0.463072	0.00126489	0.00118583									0.69	LTA 23/11-4	14	49	89	58	210	6.66667	23.3333	42.381	27.619	100
LTA	Euthynnus alletteratus	NO SE SABE	2012-11-23	NOVIEMBRE	31	2012-11-23	26760	555	574	2400	2180	1	2	2.59	61.57	2.63296	0.108033	0.00140389	0.0012752									0.13	LTA 23/11-5	0	0	0	210	210	0	0	0	100	100
LTA	Euthynnus alletteratus	NO SE SABE	2012-11-23	NOVIEMBRE	31	2012-11-23	26760	482	502	1740	1540	2	2	2.23	50.6	2.99515	0.128325	0.00155385	0.00137524									0.32	LTA 23/11-6
LTA	Euthynnus alletteratus	NO SE SABE	2012-11-23	NOVIEMBRE	31	2012-11-23	26760	476	493	1620	1460	2	2	6.51	55.06	3.51835	0.403473	0.00150208	0.00135373									0.69	LTA 23/11-7	10	55	85	60	210	4.7619	26.1905	40.4762	28.5714	100
LTA	Euthynnus alletteratus	NO SE SABE	2012-11-23	NOVIEMBRE	31	2012-11-23	26760	475	497	1560	1420	2	2	7.12	45.13	2.97913	0.458503	0.00145561	0.00132497									0.97	LTA 23/11-8	18	69	73	50	210	8.57143	32.8571	34.7619	23.8095	100
LTA	Euthynnus alletteratus	NO SE SABE	2012-11-23	NOVIEMBRE	31	2012-11-23	26760	491	510	1700	1540	2	2	6.32	41.52	2.5035	0.373152	0.00143617	0.001301									0.79	LTA 23/11-9	14	81	117	49	261	5.36398	31.0345	44.8276	18.7739	100
LTA	Euthynnus alletteratus	NO SE SABE	2012-11-23	NOVIEMBRE	31	2012-11-23	26760	515	540	2100	1920	1	2	2.56	60.94	2.98863	0.122054	0.00153744	0.00140566									0.38	LTA 23/11-10	10	62	0	138	210	4.7619	29.5238	0	65.7143	100
LTA	Euthynnus alletteratus	NO SE SABE	2012-11-23	NOVIEMBRE	31	2012-11-23	26760	493	508	1620	1480	1	2	0.73	42.42	2.68893	0.045082	0.00135199	0.00123515									0.09	LTA 23/11-11	0	16	0	194	210	0	7.61905	0	92.381	100
LTA	Euthynnus alletteratus	NO SE SABE	2012-11-23	NOVIEMBRE	31	2012-11-23	26760	464	486	1500	1360	1	2	1.28	36.34	2.48282	0.0854062	0.00150154	0.0013614									0.23	LTA 23/11-12	0	12	0	198	210	0	5.71429	0	94.2857	100
LTA	Euthynnus alletteratus	NO SE SABE	2012-11-23	NOVIEMBRE	31	2012-11-23	26760	525	541	1980	1840	1	2	1.73	46.06	2.38167	0.0874501	0.00136832	0.00127157									0.16	LTA 23/11-13	0	0	0	210	210	0	0	0	100	100
LTA	Euthynnus alletteratus	NO SE SABE	2012-11-23	NOVIEMBRE	31	2012-11-23	26760	518	538	2040	1940	2	5	10.1	28.58	1.42089	0.497561	0.00146771	0.00139577									1.21	LTA 23/11-14	15	70	66	59	210	7.14286	33.3333	31.4286	28.0952	100
LTA	Euthynnus alletteratus	NO SE SABE	2012-11-23	NOVIEMBRE	31	2012-11-23	26760	495	510	1640	1520	1	2	1.81	42.61	2.66748	0.110488	0.00135216	0.00125322									0.24	LTA 23/11-15	0	9	0	201	210	0	4.28571	0	95.7143	100
LTA	Euthynnus alletteratus	MATA DE UVA	2010-06-22	JUNIO	10	2010-06-25	245877	378	395	730	670	2	5	8.07	32.25	4.622	1.11784	0.0013516	0.00124051	0	6.54	Ea25061033	Ea25061033	Ea25061033						149	16	41	4	210	70.9524	7.61905	19.5238	1.90476	100
LTA	Euthynnus alletteratus	MATA DE UVA	2010-06-22	JUNIO	10	2010-06-25	245877	370	384	730	670	2	5	9.09	27.66	3.93826	1.26091	0.00144118	0.00132273	0	6.64	Ea25061034	Ea25061034	Ea25061034						155	11	41	3	210	73.8095	5.2381	19.5238	1.42857	100
LTA	Euthynnus alletteratus	MATA DE UVA	2010-06-22	JUNIO	10	2010-06-25	245877	383	395	780	710	2	4	14.38	33.24	4.45123	1.87822	0.00138835	0.00126375	0	7.08	Ea25061032	Ea25061032	Ea25061032						194	9	7	0	210	92.381	4.28571	3.33333	0	100
LTA	Euthynnus alletteratus	MATA DE UVA	2010-06-22	JUNIO	10	2010-06-25	245877	355	370	770	680	2	3	33.68	67.17	9.55708	4.5741	0.0017211	0.00151993	0	4.33	Ea25061038	Ea25061038	Ea25061038						144	0	64	2	210	68.5714	0	30.4762	0.952381	100
LTA	Euthynnus alletteratus	MATA DE UVA	2010-06-22	JUNIO	10	2010-06-25	245877	384	396	800	730	2	5	9.01	35.45	4.63671	1.13908	0.00141285	0.00128923	0	7.83	Ea25061021	Ea25061021	Ea25061021						146	9	47	8	210	69.5238	4.28571	22.381	3.80952	100
LTA	Euthynnus alletteratus	MATA DE UVA	2010-06-22	JUNIO	10	2010-06-25	245877	371	382	700	640	2	5	6.36	33.87	5.08459	0.916902	0.00137081	0.00125331	0	6.1	Ea25061039	Ea25061039	Ea25061039						116	4	83	7	210	55.2381	1.90476	39.5238	3.33333	100
LTA	Euthynnus alletteratus	MATA DE UVA	2010-06-22	JUNIO	10	2010-06-25	245877	378	393	800	730	2	5	8.7	37.59	4.93042	1.09946	0.0014812	0.0013516	0	7.25	Ea25061005	Ea25061005	Ea25061005						159	16	34	1	210	75.7143	7.61905	16.1905	0.47619	100
LTA	Euthynnus alletteratus	MATA DE UVA	2010-06-22	JUNIO	10	2010-06-25	245877	370	389	770	700	2	5	6.88	34.07	4.62952	0.901562	0.00152015	0.00138195	1	6.96	Ea25061019	Ea25061019	Ea25061019	Ea25061019				Ea25061020	106	4	91	9	210	50.4762	1.90476	43.3333	4.28571	100
LTA	Euthynnus alletteratus	MATA DE UVA	2010-06-22	JUNIO	10	2010-06-25	245877	374	397	750	690	2	5	4.93	34.72	4.85404	0.661683	0.00143366	0.00131897	0	7.9	Ea25061015	Ea25061015	Ea25061015						77	16	111	6	210	36.6667	7.61905	52.8571	2.85714	100

[truncated: 9 more sheets: BODY INDEXES MALES, BODY INDEXES AND SE MALES, PIVOT TABLE BODY INDEXES MALES, GENERAL DATABASE , FORK LENGHT, PIVOT TABLE BODY INDEXES FEMALES, BODY INDEXES AND SE FEMALES, BODY INDEXES FEMALES, IG VS TEMPERATURE MALES AND FEMALES]
